# Supplementary material
Source: ML conference proceedings conference paper supplement (https://proceedings.neurips.cc/paper_files/paper/2016/hash/92262bf907af914b95a0fc33c3f33bf6-Abstract.html)
Supplement: Supplementary file [file 92262bf907af914b95a0fc33c3f33bf6-Supplemental.zip]

## Supplemental Materials

**Lemma 3.** *Under Assumption 3, two subsequent iterates in Algorithm 1 satisfy*

$$\|\mathbf{x}_k - \mathbf{x}_{k+1}\|^2 \leq \Theta(\alpha_k^2).$$

*Proof.* From the definition of the proximal operation, we have

$$\begin{aligned} \mathbf{x}_{k+1} &= \text{prox}_{\alpha_k R(\cdot)}(\mathbf{x}_k - \alpha_k \nabla g_{w_k}^\top(\mathbf{x}_k) \nabla f_{v_k}(\mathbf{y}_k)) \\ &= \arg \min_x \frac{1}{2} \|\mathbf{x} - \mathbf{x}_k + \alpha_k \nabla g_{w_k}^\top(\mathbf{x}_k) \nabla f_{v_k}(\mathbf{y}_k)\|^2 + \alpha_k R(\mathbf{x}). \end{aligned}$$

The optimality condition suggests the following equality:

$$\mathbf{x}_{k+1} - \mathbf{x}_k = -\alpha_k (\nabla g_{w_k}^\top(\mathbf{x}_k) \nabla f_{v_k}(\mathbf{y}_k) + \mathbf{s}_{k+1}) \quad (11)$$

where  $\mathbf{s}_{k+1} \in \partial R(\mathbf{x}_{k+1})$  is some vector in the sub-differential set of  $R(\cdot)$  at  $\mathbf{x}_{k+1}$ . Then apply the boundedness condition in Assumption 3 to yield

$$\begin{aligned} \|\mathbf{x}_{k+1} - \mathbf{x}_k\| &= \alpha_k \|\nabla g_{w_k}^\top(\mathbf{x}_k) \nabla f_{v_k}(\mathbf{y}_k) + \mathbf{s}_{k+1}\| \\ &\leq \alpha_k (\|\nabla g_{w_k}^\top(\mathbf{x}_k) \nabla f_{v_k}(\mathbf{y}_k)\| + \|\mathbf{s}_{k+1}\|) \\ &\leq \alpha_k (\|\nabla g_{w_k}^\top(\mathbf{x}_k)\| \|\nabla f_{v_k}(\mathbf{y}_k)\| + \|\mathbf{s}_{k+1}\|) \\ &\stackrel{(\text{Assumption 3})}{\leq} \Theta(1) \alpha_k, \end{aligned}$$

which implies the claim.  $\square$

**Lemma 4.** *Under Assumptions 3 and 4, we have*

$$\|\nabla g_w^\top(\mathbf{x}) \nabla f_v(g(\mathbf{x})) - \nabla g_w^\top(\mathbf{x}) \nabla f_v(\mathbf{y})\| \leq \Theta(L_f \|\mathbf{y} - g(\mathbf{x})\|).$$

*Proof.* We have

$$\begin{aligned} \|\nabla g_w^\top(\mathbf{x}) \nabla f_v(g(\mathbf{x})) - \nabla g_w^\top(\mathbf{x}) \nabla f_v(\mathbf{y})\| &\leq \|\nabla g_w^\top(\mathbf{x})\| \|\nabla f_v(g(\mathbf{x})) - \nabla f_v(\mathbf{y})\| \\ &\stackrel{(\text{Assumption 3})}{\leq} \Theta(1) \|\nabla f_v(g(\mathbf{x})) - \nabla f_v(\mathbf{y})\| \\ &\stackrel{(\text{Assumption 4})}{\leq} \Theta(L_f) \|\mathbf{y} - g(\mathbf{x})\|. \end{aligned}$$

It completes the proof.  $\square$

**Lemma 5.** *Given a positive sequence  $\{w_k\}_{k=1}^\infty$  satisfying*

$$w_{k+1} \leq (1 - \beta_k + C_1 \beta_k^2) w_k + C_2 k^{-a} \quad (12)$$

where  $C_1 \geq 0$ ,  $C_2 \geq 0$ , and  $a \geq 0$ . Choosing  $\beta_k$  to be  $\beta_k = C_3 k^{-b}$  where  $b \in (0, 1]$  and  $C_3 > 2$ , the sequence can be bounded by

$$w_k \leq C k^{-c}$$

where  $C$  and  $c$  are defined as

$$C := \max_{k \leq (C_1 C_3^2)^{1/b} + 1} w_k k^c + \frac{C_2}{C_3 - 2} \quad \text{and} \quad c := a - b.$$

In other words, we have

$$w_k \leq \Theta(k^{-a+b}).$$

*Proof.* We prove it by induction. First it is easy to verify that the claim holds for  $k \leq (C_1 C_3^2)^{1/b}$  from the definition for  $C$ . Next we prove from “ $k$ ” to “ $k + 1$ ”, that is, given  $w_k \leq C k^{-c}$  for  $k > (C_1 C_3^2)^{1/b}$ , we need to prove  $w_{k+1} \leq C(k+1)^{-c}$ .

$$\begin{aligned} w_{k+1} &\leq (1 - \beta_k + C_1 \beta_k^2) w_k + C_2 k^{-a} \\ &\leq (1 - C_3 k^{-b} + C_1 C_3^2 k^{-2b}) C k^{-c} + C_2 k^{-a} \end{aligned}$$

$$= Ck^{-c} - CC_3k^{-b-c} + CC_1C_3^2k^{-2b-c} + C_2k^{-a}. \quad (13)$$

To prove that (13) is bounded by  $C(k+1)^{-c}$ , it suffices to show that

$$\Delta := (k+1)^{-c} - k^{-c} + C_3k^{-b-c} - C_1C_3^2k^{-2b-c} > 0 \quad \text{and} \quad C \geq \frac{C_2k^{-a}}{\Delta}.$$

From the convexity of function  $h(t) = t^{-c}$ , we have the inequality  $(k+1)^{-c} - k^{-c} \geq (-c)k^{-c-1}$ . Therefore we obtain

$$\begin{aligned} \Delta &\geq -ck^{-c-1} + C_3k^{-b-c} - C_1C_3^2k^{-2b-c} \\ &\stackrel{(b \leq 1, k > (C_1C_3^2)^{1/b})}{\geq} (C_3 - 2)(k^{-b-c}) \\ &\stackrel{(C_3 > 2)}{>} 0. \end{aligned}$$

To verify the second one, we have

$$\frac{C_2k^{-a}}{\Delta} \leq \frac{C_2}{C_3 - 2} k^{-a+b+c} \stackrel{(c=a+b)}{=} \frac{C_2}{C_3 - 2} \leq C$$

where the last inequality is due to the definition of  $C$ . It completes the proof.  $\square$

**Lemma 6.** Choose  $\beta_k$  to be  $\beta_k = C_b k^{-b}$  where  $C_b > 2$ ,  $b \in (0, 1]$ , and  $\alpha_k = C_a k^{-a}$ . Under Assumptions 1 and 2, we have

$$\mathbb{E}(\|\mathbf{y}_k - g(\mathbf{x}_k)\|^2) \leq L_g \Theta(k^{-4a+4b}) + \Theta(k^{-b}). \quad (14)$$

*Proof.* Denote by  $m_{k+1}$

$$m_{k+1} := \sum_{t=0}^k \xi_t^{(k)} \|\mathbf{x}_{k+1} - \mathbf{z}_{t+1}\|^2$$

and  $n_{k+1}$

$$n_{k+1} := \left\| \sum_{t=0}^k \xi_t^{(k)} (g_{w_{t+1}}(\mathbf{z}_{t+1}) - g(\mathbf{z}_{t+1})) \right\|^2$$

for short.

From Lemma 10 in [Wang et al., 2016], we have

$$\|\mathbf{y}_k - g(\mathbf{x}_k)\|^2 \leq \left( \frac{L_g}{2} m_k + n_k \right)^2 \leq L_g m_k^2 + 2n_k^2. \quad (15)$$

From Lemma 11 in [Wang et al., 2016],  $m_{k+1}$  can be bounded by

$$m_{k+1} \leq (1 - \beta_k)m_k + \beta_k q_k + \frac{2}{\beta_k} \|\mathbf{x}_k - \mathbf{x}_{k+1}\|^2 \quad (16)$$

where  $q_k$  is bounded by

$$\begin{aligned} q_{k+1} &\leq (1 - \beta_k)q_k + \frac{4}{\beta_k} \|\mathbf{x}_{k+1} - \mathbf{x}_k\|^2 \\ &\stackrel{(\text{Lemma 3})}{\leq} (1 - \beta_k)q_k + \frac{\Theta(1)\alpha_k^2}{\beta_k} \\ &\leq (1 - \beta_k)q_k + \Theta(k^{-2a+b}). \end{aligned}$$

Use Lemma 5 and obtain the following decay rate

$$q_k \leq \Theta(k^{-2a+2b}).$$

Together with (16), we have

$$m_{k+1} \leq (1 - \beta_k)m_k + \beta_k q_k + \frac{2}{\beta_k} \|\mathbf{x}_k - \mathbf{x}_{k+1}\|^2$$

$$\begin{aligned}
&\leq (1 - \beta_k)m_k + \Theta(k^{-2a+b}) + \Theta(k^{-2a+b}) \\
&\leq (1 - \beta_k)m_k + \Theta(k^{-2a+b}),
\end{aligned}$$

which leads to

$$m_k \leq \Theta(k^{-2a+2b}) \quad \text{and} \quad m_k^2 \leq \Theta(k^{-4a+4b}). \quad (17)$$

by using Lemma 5 again. Then we estimate the upper bound for  $\mathbb{E}(n_k^2)$ . From Lemma 11 in [Wang et al., 2016], we know  $\mathbb{E}(n_k^2)$  is bounded by

$$\mathbb{E}(n_{k+1}^2) \leq (1 - \beta_k)^2 \mathbb{E}(\|n_k\|^2) + \beta_k^2 \sigma_g^2 = (1 - 2\beta_k + \beta_k^2) \mathbb{E}(\|n_k\|^2) + \beta_k^2 \sigma_g^2.$$

By using Lemma 5 again, we have

$$\mathbb{E}(n_k^2) \leq \Theta(k^{-b}). \quad (18)$$

Now we are ready to estimate the upper bound of  $\|\mathbf{y}_{k+1} - g(\mathbf{x}_{k+1})\|^2$  by following (15)

$$\begin{aligned}
\mathbb{E}(\|\mathbf{y}_k - g(\mathbf{x}_k)\|^2) &\leq L_g \mathbb{E}(m_k^2) + 2\mathbb{E}(n_k^2) \\
&\stackrel{(17)+(18)}{\leq} L_g \Theta(k^{-4a+4b}) + \Theta(k^{-b}).
\end{aligned}$$

It completes the proof.  $\square$

### Proof to Theorem 1

*Proof.* From the Lipschitzian condition in Assumption 4, we have

$$\begin{aligned}
&F(\mathbf{x}_{k+1}) - F(\mathbf{x}_k) \\
&\leq \langle \nabla F(\mathbf{x}_k), \mathbf{x}_{k+1} - \mathbf{x}_k \rangle + \frac{L_F}{2} \|\mathbf{x}_{k+1} - \mathbf{x}_k\|^2 \\
&\stackrel{(\text{Lemma 5})}{\leq} -\alpha_k \langle \nabla F(\mathbf{x}_k), \nabla g_{w_k}^\top(\mathbf{x}_k) \nabla f_{v_k}(\mathbf{y}_k) \rangle + \Theta(\alpha_k^2) \\
&= -\alpha_k \|\nabla F(\mathbf{x}_k)\|^2 + \alpha_k \underbrace{\langle \nabla F(\mathbf{x}_k), \nabla F(\mathbf{x}_k) - \nabla g_{w_k}^\top(\mathbf{x}_k) \nabla f_{v_k}(\mathbf{y}_k) \rangle}_{=:T} \\
&\quad + \Theta(\alpha_k^2)
\end{aligned} \quad (19)$$

Next we estimate the upper bound for  $\mathbb{E}(T)$ :

$$\begin{aligned}
\mathbb{E}(T) &= \mathbb{E}(\langle \nabla F(\mathbf{x}_k), \nabla F(\mathbf{x}_k) - \nabla g_{w_k}^\top(\mathbf{x}_k) \nabla f_{v_k}(g(\mathbf{x}_k)) \rangle) \\
&\quad + \mathbb{E}(\langle \nabla F(\mathbf{x}_k), \nabla g_{w_k}^\top(\mathbf{x}_k) \nabla f_{v_k}(g(\mathbf{x}_k)) - \nabla g_{w_k}^\top(\mathbf{x}_k) \nabla f_{v_k}(\mathbf{y}_k) \rangle) \\
&\stackrel{(\text{Assumption 1})}{=} \mathbb{E}(\langle \nabla F(\mathbf{x}_k), \nabla g_{w_k}^\top(\mathbf{x}_k) \nabla f_{v_k}(g(\mathbf{x}_k)) - \nabla g_{w_k}^\top(\mathbf{x}_k) \nabla f_{v_k}(\mathbf{y}_k) \rangle) \\
&\leq \frac{1}{2} \mathbb{E}(\|\nabla F(\mathbf{x}_k)\|^2) + \frac{1}{2} \mathbb{E}(\|\nabla g_{w_k}^\top(\mathbf{x}_k) \nabla f_{v_k}(g(\mathbf{x}_k)) - \nabla g_{w_k}^\top(\mathbf{x}_k) \nabla f_{v_k}(\mathbf{y}_k)\|^2) \\
&\stackrel{(\text{Lemma 4})}{\leq} \frac{1}{2} \mathbb{E}(\|\nabla F(\mathbf{x}_k)\|^2) + \Theta(L_f^2) \mathbb{E}(\|\mathbf{y}_k - g(\mathbf{x}_k)\|^2).
\end{aligned}$$

Take expectation on both sides of (19) and substitute  $\mathbb{E}(T)$  by its upper bound:

$$\begin{aligned}
&\frac{\alpha_k}{2} \|\nabla F(\mathbf{x}_k)\|^2 \\
&\leq \mathbb{E}(F(\mathbf{x}_k)) - \mathbb{E}(F(\mathbf{x}_{k+1})) + \Theta(L_f^2 \alpha_k) \mathbb{E}(\|\mathbf{y}_k - g(\mathbf{x}_k)\|^2) + \Theta(\alpha_k^2) \\
&\stackrel{(\text{Lemma 6})}{\leq} \mathbb{E}(F(\mathbf{x}_k)) - \mathbb{E}(F(\mathbf{x}_{k+1})) + L_g \Theta(L_f^2 \alpha_k) \Theta(k^{-4a+4b}) + \Theta(L_f^2 \alpha_k k^{-b}) + \Theta(\alpha_k^2) \\
&\leq \mathbb{E}(F(\mathbf{x}_k)) - \mathbb{E}(F(\mathbf{x}_{k+1})) + L_f^2 L_g \Theta(k^{-5a+4b}) + L_f^2 \Theta(k^{-a-b}) + \Theta(k^{-2a})
\end{aligned}$$

which suggests that

$$\begin{aligned}
&\mathbb{E}(\|\nabla F(\mathbf{x}_k)\|^2) \\
&\leq 2\alpha_k^{-1} \mathbb{E}(F(\mathbf{x}_k)) - 2\alpha_k^{-1} \mathbb{E}(F(\mathbf{x}_{k+1})) + L_f^2 L_g \Theta(k^{-4a+4b}) + L_f^2 \Theta(k^{-b}) + \Theta(k^{-a})
\end{aligned}$$

$$\leq 2k^a \mathbb{E}(F(\mathbf{x}_k)) - 2k^a \mathbb{E}(F(\mathbf{x}_{k+1})) + L_f^2 L_g \Theta(k^{-4a+4b}) + L_f^2 \Theta(k^{-b}) + \Theta(k^{-a}). \quad (20)$$

Summarize Eq. (20) from  $k = 1$  to  $K$  and obtain

$$\begin{aligned} \frac{\sum_{k=1}^K \mathbb{E}(\|\nabla F(\mathbf{x}_k)\|^2)}{K} &\leq 2K^{-1} \alpha_1^{-1} F(\mathbf{x}_1) + K^{-1} \sum_{k=2}^K ((k+1)^a - k^a) \mathbb{E}(F(\mathbf{x}_k)) \\ &\quad + K^{-1} \sum_{k=1}^K L_f^2 L_g \Theta(k^{-4a+4b}) + K^{-1} L_f^2 \sum_{k=1}^K \Theta(k^{-b}) + K^{-1} \sum_{k=1}^K \Theta(k^{-a}) \\ &\leq 2K^{-1} F(\mathbf{x}_0) + K^{-1} \sum_{k=2}^K a k^{a-1} \mathbb{E}(F(\mathbf{x}_k)) \\ &\quad + K^{-1} \sum_{k=1}^K L_f^2 L_g \Theta(k^{-4a+4b}) + K^{-1} L_f^2 \sum_{k=1}^K \Theta(k^{-b}) + K^{-1} \sum_{k=1}^K \Theta(k^{-a}) \\ &\leq O(K^{a-1} + L_f^2 L_g K^{4b-4a} \mathbf{I}_{4a-4b=1}^{\log K} + L_f^2 K^{-b} + K^{-a}), \end{aligned}$$

where the second inequality uses the fact that  $h(t) = t^a$  is a concave function suggesting  $(k+1)^a \leq k^a + a k^{a-1}$ , and the last inequality uses the condition  $\mathbb{E}(F(\mathbf{x}_k)) \leq \Theta(1)$ .

The optimal  $a^* = 5/9$  and the optimal  $b^* = 4/9$ , which leads to the convergence rate  $O(K^{-4/9})$ .  $\square$

**Lemma 7.** Assume that both  $F(\mathbf{x})$  and  $R(\mathbf{x})$  are convex. Under Assumptions 1, 2, 3, and 4, the iterates generated by Algorithm 1 satisfies for any sequence of positive scalars  $\{\phi_k\}$ :

$$\begin{aligned} &2\alpha_k (\mathbb{E}(H(\mathbf{x}_{k+1})) - H^*) + \mathbb{E}(\|\mathbf{x}_{k+1} - \mathcal{P}_{X^*}(\mathbf{x}_{k+1})\|^2) \\ &\leq (1 + \phi_k) \mathbb{E}(\|\mathbf{x}_k - \mathcal{P}_{X^*}(\mathbf{x}_k)\|^2) + \Theta(\alpha_k^3) + \Theta(L_f^2 \alpha_k^2 / \phi_k) \mathbb{E}(\|\mathbf{y}_k - g(\mathbf{x}_k)\|^2) + \Theta(\alpha_k^2). \end{aligned} \quad (P_k)$$

*Proof.* Following the line of the proof to Lemma 3, we have

$$\mathbf{x}_{k+1} - \mathbf{x}_k = -\alpha_k (\nabla g_{w_k}^\top(\mathbf{x}_k) \nabla f_{v_k}(\mathbf{y}_k) + \mathbf{s}_{k+1}) \quad (21)$$

where  $\mathbf{s}_{k+1} \in \partial R(\mathbf{x}_{k+1})$  is some vector in the sub-differential set of  $R(\cdot)$  at  $\mathbf{x}_{k+1}$ . Then we consider  $\|\mathbf{x}_{k+1} - \mathcal{P}_{X^*}(\mathbf{x}_{k+1})\|^2$ :

$$\begin{aligned} &\|\mathbf{x}_{k+1} - \mathcal{P}_{X^*}(\mathbf{x}_{k+1})\|^2 \\ &\leq \|\mathbf{x}_{k+1} - \mathbf{x}_k + \mathbf{x}_k - \mathcal{P}_{X^*}(\mathbf{x}_k)\|^2 \\ &= \|\mathbf{x}_k - \mathcal{P}_{X^*}(\mathbf{x}_k)\|^2 - \|\mathbf{x}_{k+1} - \mathbf{x}_k\|^2 + 2\langle \mathbf{x}_{k+1} - \mathbf{x}_k, \mathbf{x}_{k+1} - \mathcal{P}_{X^*}(\mathbf{x}_k) \rangle \\ (21) \quad &= \|\mathbf{x}_k - \mathcal{P}_{X^*}(\mathbf{x}_k)\|^2 - \|\mathbf{x}_{k+1} - \mathbf{x}_k\|^2 - 2\alpha_k \langle \nabla g_{w_k}^\top(\mathbf{x}_k) \nabla f_{v_k}(\mathbf{y}_k) + \mathbf{s}_{k+1}, \mathbf{x}_{k+1} - \mathcal{P}_{X^*}(\mathbf{x}_k) \rangle \\ &= \|\mathbf{x}_k - \mathcal{P}_{X^*}(\mathbf{x}_k)\|^2 - \|\mathbf{x}_{k+1} - \mathbf{x}_k\|^2 + 2\alpha_k \langle \nabla g_{w_k}^\top(\mathbf{x}_k) \nabla f_{v_k}(\mathbf{y}_k), \mathcal{P}_{X^*}(\mathbf{x}_k) - \mathbf{x}_{k+1} \rangle \\ &\quad + 2\alpha_k \langle \mathbf{s}_{k+1}, \mathcal{P}_{X^*}(\mathbf{x}_k) - \mathbf{x}_{k+1} \rangle \\ &\leq \|\mathbf{x}_k - \mathcal{P}_{X^*}(\mathbf{x}_k)\|^2 - \|\mathbf{x}_{k+1} - \mathbf{x}_k\|^2 + 2\alpha_k \langle \nabla g_{w_k}^\top(\mathbf{x}_k) \nabla f_{v_k}(\mathbf{y}_k), \mathcal{P}_{X^*}(\mathbf{x}_k) - \mathbf{x}_{k+1} \rangle \\ &\quad + 2\alpha_k (R(\mathcal{P}_{X^*}(\mathbf{x}_k)) - R(\mathbf{x}_{k+1})) \quad (\text{due to the convexity of } R(\cdot)) \\ &\leq \|\mathbf{x}_k - \mathcal{P}_{X^*}(\mathbf{x}_k)\|^2 - \|\mathbf{x}_{k+1} - \mathbf{x}_k\|^2 + 2\alpha_k \underbrace{\langle \nabla F(\mathbf{x}_k), \mathcal{P}_{X^*}(\mathbf{x}_k) - \mathbf{x}_{k+1} \rangle}_{T_1} \\ &\quad + 2\alpha_k \underbrace{\langle \nabla g_{w_k}^\top(\mathbf{x}_k) \nabla f_{v_k}(\mathbf{y}_k) - \nabla F(\mathbf{x}_k), \mathcal{P}_{X^*}(\mathbf{x}_k) - \mathbf{x}_{k+1} \rangle}_{T_2} \\ &\quad + 2\alpha_k (R(\mathcal{P}_{X^*}(\mathbf{x}_k)) - R(\mathbf{x}_{k+1})) \end{aligned} \quad (22)$$

where the second equality follows from  $\|a + b\|^2 = \|b\|^2 - \|a\|^2 + 2\langle a, a + b \rangle$  with  $a = \mathbf{x}_{k+1} - \mathbf{x}_k$  and  $b = \mathbf{x}_k - \mathcal{P}_{X^*}(\mathbf{x}_k)$ . We next estimate the upper bound for  $T_1$  and  $T_2$  respectively:

$$T_1 = \langle \nabla F(\mathbf{x}_k), \mathbf{x}_k - \mathbf{x}_{k+1} \rangle + \langle \nabla F(\mathbf{x}_k), -\mathbf{x}_k + \mathcal{P}_{X^*}(\mathbf{x}_k) \rangle$$

$$\begin{aligned}
&\leq \underbrace{F(\mathbf{x}_k) - F(\mathbf{x}_{k+1}) + \frac{L_F}{2} \|\mathbf{x}_{k+1} - \mathbf{x}_k\|^2}_{\text{due to Assumption 4}} + \underbrace{F(\mathcal{P}_{X^*}(\mathbf{x}_k)) - F(\mathbf{x}_k)}_{\text{due to the convexity of } F(\cdot)} \\
&= F(\mathcal{P}_{X^*}(\mathbf{x}_k)) - F(\mathbf{x}_{k+1}) + \frac{L_F}{2} \|\mathbf{x}_{k+1} - \mathbf{x}_k\|^2 \\
&\leq F(\mathcal{P}_{X^*}(\mathbf{x}_k)) - F(\mathbf{x}_{k+1}) + \Theta(\alpha_k^2),
\end{aligned}$$

where the last inequality uses Lemma 3.

$$\begin{aligned}
T_2 &= \langle \nabla F(\mathbf{x}_k) - \nabla g_{w_k}^\top(\mathbf{x}_k) \nabla f_{v_k}(\mathbf{y}_k), \mathbf{x}_k - \mathcal{P}_{X^*}(\mathbf{x}_k) \rangle \\
&\quad + \langle \nabla F(\mathbf{x}_k) - \nabla g_{w_k}^\top(\mathbf{x}_k) \nabla f_{v_k}(\mathbf{y}_k), \mathbf{x}_{k+1} - \mathbf{x}_k \rangle \\
&\leq \underbrace{\langle \nabla F(\mathbf{x}_k) - \nabla g_{w_k}^\top(\mathbf{x}_k) \nabla f_{v_k}(g(\mathbf{x}_k)), \mathbf{x}_k - \mathcal{P}_{X^*}(\mathbf{x}_k) \rangle}_{T_{2,1}} \\
&\quad + \underbrace{\langle \nabla g_{w_k}^\top(\mathbf{x}_k) \nabla f_{v_k}(g(\mathbf{x}_k)) - \nabla g_{w_k}^\top(\mathbf{x}_k) \nabla f_{v_k}(\mathbf{y}_k), \mathbf{x}_k - \mathcal{P}_{X^*}(\mathbf{x}_k) \rangle}_{T_{2,2}} \\
&\quad + \frac{\alpha_k}{2} \underbrace{\|\nabla F(\mathbf{x}_k) - \nabla g_{w_k}^\top(\mathbf{x}_k) \nabla f_{v_k}(\mathbf{y}_k)\|^2}_{T_{2,3}} + \frac{1}{2\alpha_k} \|\mathbf{x}_k - \mathbf{x}_{k+1}\|^2
\end{aligned}$$

where the last line is due to the inequality  $\langle a, b \rangle \leq \frac{1}{2\alpha_k} \|a\|^2 + \frac{\alpha_k}{2} \|b\|^2$ . For  $T_{2,1}$ , we have  $\mathbb{E}(T_{2,1}) = 0$  due to Assumption 1. For  $T_{2,2}$ , we have

$$\begin{aligned}
T_{2,2} &\leq \frac{\alpha_k}{2\phi_k} \|\nabla g_{w_k}^\top(\mathbf{x}_k) \nabla f_{v_k}(g(\mathbf{x}_k)) - \nabla g_{w_k}^\top(\mathbf{x}_k) \nabla f_{v_k}(\mathbf{y}_k)\|^2 + \frac{\phi_k}{2\alpha_k} \|\mathbf{x}_k - \mathcal{P}_{X^*}(\mathbf{x}_k)\|^2 \\
&\stackrel{(\text{Lemma 4})}{\leq} \Theta \left( L_f^2 \frac{\alpha_k}{\phi_k} \right) \|\mathbf{y}_k - g(\mathbf{x}_k)\|^2 + \frac{\phi_k}{2\alpha_k} \|\mathbf{x}_k - \mathbf{x}_{k+1}\|^2.
\end{aligned}$$

$T_{2,3}$  can be bounded by a constant

$$T_{2,3} \leq 2\|\nabla F(\mathbf{x}_k)\|^2 + 2\|\nabla g_{w_k}^\top \nabla f_{v_k}(\mathbf{y}_k)\|^2 \stackrel{(\text{Assumption 3})}{\leq} \Theta(1).$$

Take expectation on  $T_2$  and put all pieces into it:

$$\mathbb{E}(T_2) \leq \Theta \left( L_f^2 \frac{\alpha_k}{\phi_k} \right) \|\mathbf{y}_k - g(\mathbf{x}_k)\|^2 + \frac{1}{2\alpha_k} (\phi_k \|\mathbf{x}_k - \mathcal{P}_{X^*}(\mathbf{x}_k)\|^2 + \|\mathbf{x}_k - \mathbf{x}_{k+1}\|^2) + \Theta(\alpha_k).$$

Taking expectation on both sides of (22) and plugging the upper bounds of  $T_1$  and  $T_2$  into it, we obtain

$$\begin{aligned}
&2\alpha_k (\mathbb{E}(H(\mathbf{x}_{k+1})) - H^*) + \mathbb{E}(\|\mathbf{x}_{k+1} - \mathcal{P}_{X^*}(\mathbf{x}_{k+1})\|^2) \\
&\leq (1 + \phi_k) \mathbb{E}(\|\mathbf{x}_k - \mathcal{P}_{X^*}(\mathbf{x}_k)\|^2) + \Theta(\alpha_k^3) + \Theta(L_f^2 \alpha_k^2 / \phi_k) \mathbb{E}(\|\mathbf{y}_k - g(\mathbf{x}_k)\|^2) + \Theta(\alpha_k^2),
\end{aligned}$$

which completes the proof.  $\square$

## Proof to Theorem 2

*Proof.* Apply the optimally strong convexity in (7) to Lemma 7, yielding

$$\begin{aligned}
&(1 + 2\lambda\alpha_k) \mathbb{E}(\|\mathbf{x}_{k+1} - \mathcal{P}_{X^*}(\mathbf{x}_{k+1})\|^2) \\
&\leq (1 + \phi_k) \mathbb{E}(\|\mathbf{x}_k - \mathcal{P}_{X^*}(\mathbf{x}_k)\|^2) + \Theta(\alpha_k^3) + \Theta(L_f^2 \alpha_k^2 / \phi_k) \mathbb{E}(\|\mathbf{y}_k - g(\mathbf{x}_k)\|^2) + \Theta(\alpha_k^2).
\end{aligned}$$

It follows by dividing  $1 + 2\lambda\alpha_k$  on both sides

$$\begin{aligned}
&\mathbb{E}(\|\mathbf{x}_{k+1} - \mathcal{P}_{X^*}(\mathbf{x}_{k+1})\|^2) \\
&\leq \frac{1 + \phi_k}{1 + 2\lambda\alpha_k} \mathbb{E}(\|\mathbf{x}_k - \mathcal{P}_{X^*}(\mathbf{x}_k)\|^2) + \Theta(\alpha_k^3) + \Theta(L_f^2 \alpha_k^2 / \phi_k) \mathbb{E}(\|\mathbf{y}_k - g(\mathbf{x}_k)\|^2) + \Theta(\alpha_k^2).
\end{aligned}$$

Choosing  $\phi_k = \lambda\alpha_k - 2\lambda^2\alpha_k^2 \geq 0.5\lambda\alpha_k$  yields

$$\begin{aligned}
& \mathbb{E}(\|\mathbf{x}_{k+1} - \mathcal{P}_{X^*}(\mathbf{x}_{k+1})\|^2) \\
& \leq (1 - \lambda\alpha_k)\mathbb{E}(\|\mathbf{x}_k - \mathcal{P}_{X^*}(\mathbf{x}_k)\|^2) + \Theta(\alpha_k^2) + \frac{\Theta(L_f^2\alpha_k)}{\lambda}\mathbb{E}(\|g(\mathbf{x}_k) - \mathbf{y}_k\|^2) \\
& \leq (1 - \lambda\alpha_k)\mathbb{E}(\|\mathbf{x}_k - \mathcal{P}_{X^*}(\mathbf{x}_k)\|^2) + \Theta(k^{-2a}) + \Theta(L_g L_f^2 k^{-5a+4b} + L_f^2 k^{-a-b}).
\end{aligned}$$

Apply Lemma 5 and substitute the subscript  $k$  by  $K$  to obtain the first claim in (8)

$$\mathbb{E}(\|\mathbf{x}_K - \mathcal{P}_{X^*}(\mathbf{x}_K)\|^2) \leq O(K^{-a} + L_f^2 L_g K^{-4a+4b} + L_f^2 K^{-b}).$$

The followed specification of  $a$  and  $b$  can easily verified. □
